# Supplementary material for: GUMICS-4 analysis of interplanetary coronal mass ejection impact on Earth during low and typical Mach number solar winds
Source: Copernicus journal article supplement (doi:10.5194/angeo-37-561-2019), 2019-07-11

Supplement of Ann. Geophys., 37, 561–579, 2019  
<https://doi.org/10.5194/angeo-37-561-2019-supplement>  
© Author(s) 2019. This work is distributed under  
the Creative Commons Attribution 4.0 License.

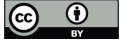

*Supplement of*

## **GUMICS-4 analysis of interplanetary coronal mass ejection impact on Earth during low and typical Mach number solar winds**

**Antti Lakka et al.**

*Correspondence to:* Antti Lakka ([antti.lakka@aalto.fi](mailto:antti.lakka@aalto.fi))

The copyright of individual parts of the supplement might differ from the CC BY 4.0 License.

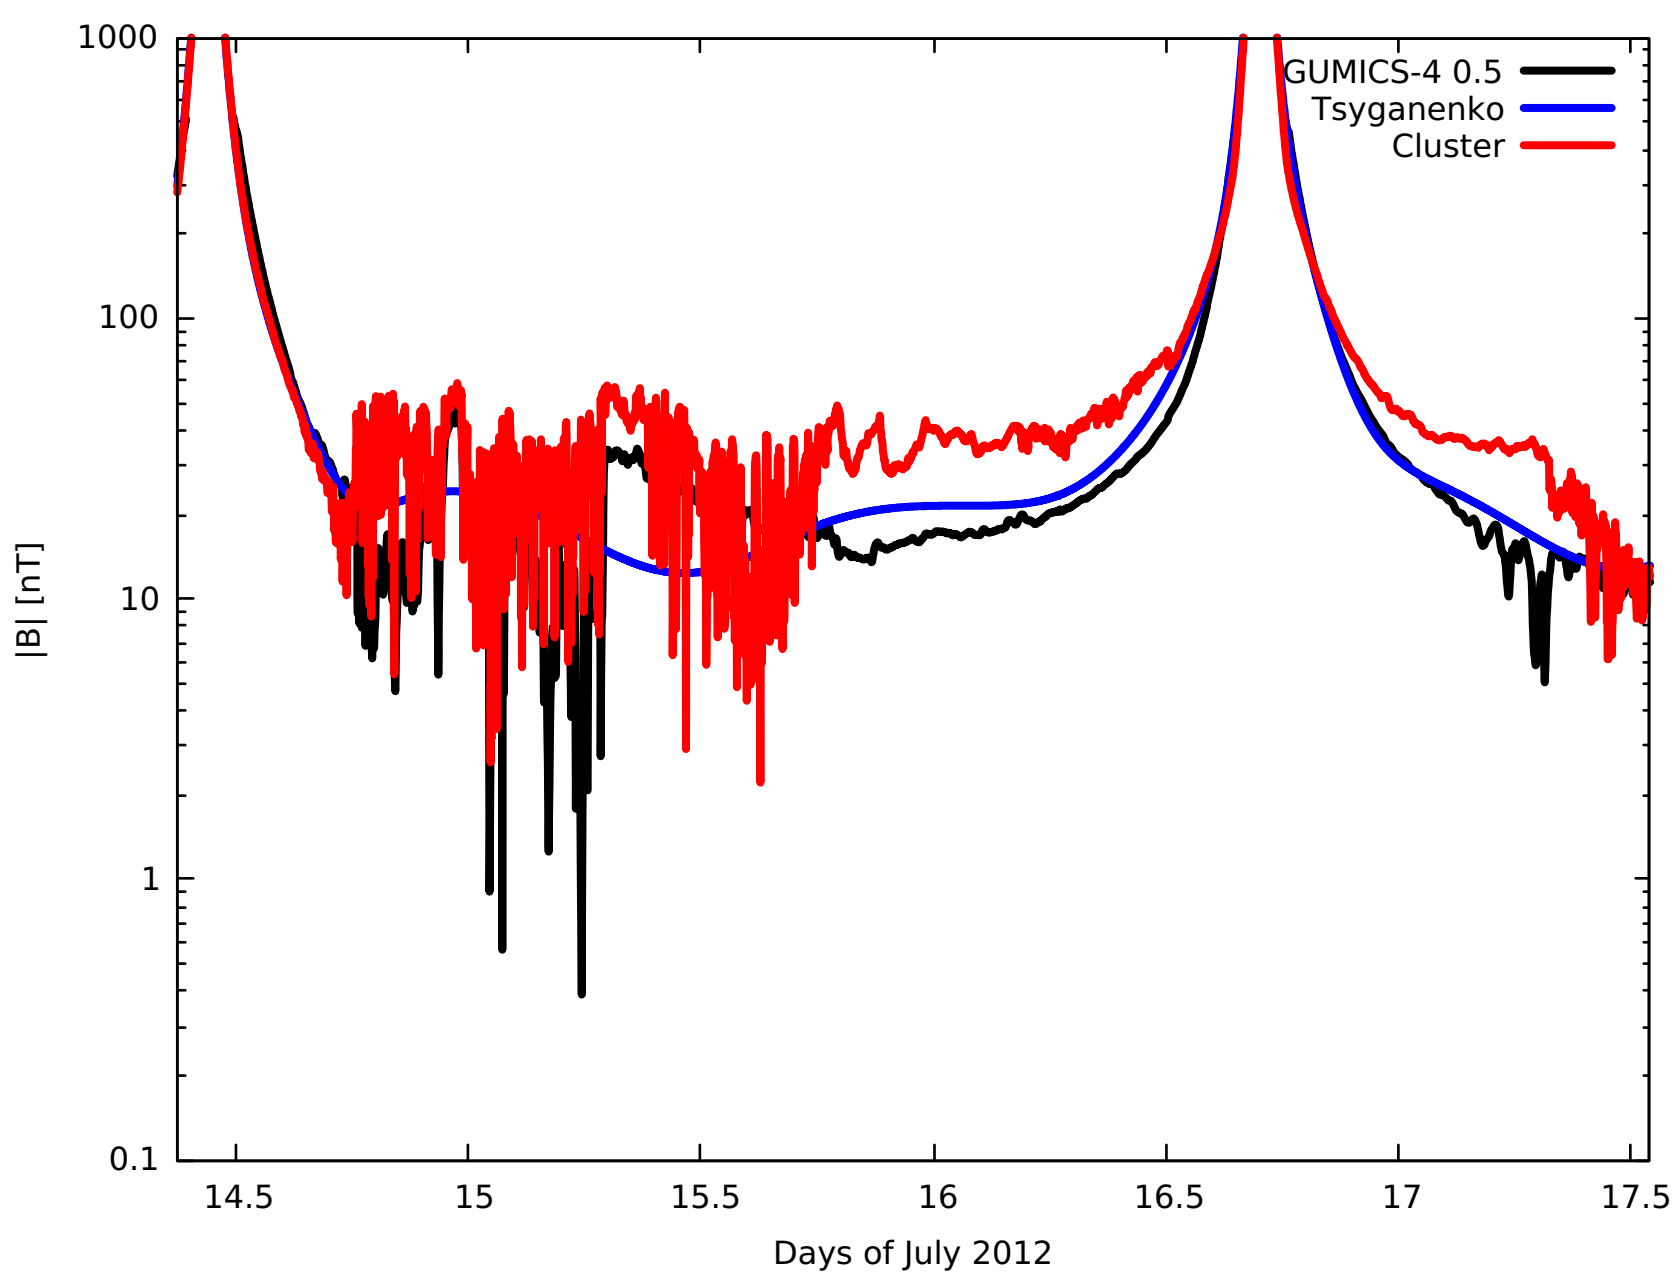

Supplement: Supplementary file 1 [file angeo-37-561-2019-supplement.pdf]
